# Supplementary material for: Influence of Soil Type and Temperature on Nitrogen Mineralization from Organic Fertilizers
Source: MDPI journal article supplement (doi:10.3390/nitrogen5010004), 2024-01-24
Supplement: s1 [file s1]

Supplemental Table S1. Complete Net N mineralized results (Net N<sub>min</sub><sup>1</sup>) from the feather meal (FM), mixed source (MIX), and pelleted poultry litter (PPL) fertilizers incubated at 4, 10, 20 and 30 °C for 120 d in a Cecil sandy clay loam soil.

| Time of<br>incubation<br>(Days) | Fertilizer | Temperature                                                                      |                  |       |     |       |      |       |      |
|---------------------------------|------------|----------------------------------------------------------------------------------|------------------|-------|-----|-------|------|-------|------|
|                                 |            | 4°C                                                                              |                  | 10°C  |     | 20°C  |      | 30°C  |      |
|                                 |            | Net N <sub>min</sub> (mg inorganic N·kg <sup>-1</sup> dry material) <sup>1</sup> |                  |       |     |       |      |       |      |
| 2                               | FM         | 0.56                                                                             | A a <sup>2</sup> | 3.72  | A a | 3.66  | A a  | 0.00  | A a  |
|                                 | MIX        | 0.00                                                                             | A a              | 4.61  | A a | 2.00  | A a  | 0.00  | A a  |
|                                 | PPL        | 0.00                                                                             | A a              | 0.00  | A a | 4.20  | A a  | 1.77  | A a  |
| 4                               | FM         | 12.31                                                                            | AB ab            | 6.17  | A b | 22.02 | A ab | 34.09 | A a  |
|                                 | MIX        | 6.01                                                                             | B ab             | 2.08  | A b | 3.08  | C b  | 9.71  | AB a |
|                                 | PPL        | 16.91                                                                            | A a              | 1.31  | A a | 10.17 | B a  | 5.45  | B a  |
| 7                               | FM         | 15.08                                                                            | Aa               | 24.10 | Aa  | 32.68 | Aa   | 36.65 | Aa   |
|                                 | MIX        | 2.32                                                                             | Ab               | 1.77  | Bb  | 18.91 | Aa   | 6.75  | Bb   |
|                                 | PPL        | 14.28                                                                            | Aa               | 16.98 | Aa  | 16.13 | Aa   | 0.00  | Bb   |
| 14                              | FM         | 31.84                                                                            | A c              | 41.66 | A b | 53.71 | A a  | 45.22 | A ab |
|                                 | MIX        | 18.87                                                                            | A a              | --    |     | 26.69 | B a  | 16.88 | B a  |
|                                 | PPL        | 15.70                                                                            | A a              | 11.97 | B a | 11.06 | C a  | 0.06  | C b  |
| 35                              | FM         | 62.00                                                                            | A b              | 58.90 | A b | 65.43 | A ab | 72.04 | A a  |
|                                 | MIX        | 32.67                                                                            | B a              | 29.42 | B a | 30.20 | B a  | 32.36 | B a  |
|                                 | PPL        | 23.61                                                                            | C a              | 20.72 | B a | 13.47 | C a  | 11.53 | C a  |
| 56                              | FM         | 57.52                                                                            | Ab               | 60.37 | Ab  | 61.84 | Ab   | 95.88 | Aa   |
|                                 | MIX        | 29.34                                                                            | Bb               | 30.86 | Bb  | 41.93 | Aab  | 46.86 | Ba   |
|                                 | PPL        | 13.36                                                                            | Ca               | 15.24 | Ca  | 14.77 | Ba   | 20.75 | Ba   |
| 88                              | FM         | 59.52                                                                            | Aa               | 63.24 | Aa  | 56.96 | Aa   | 75.33 | Aa   |
|                                 | MIX        | 33.50                                                                            | Ba               | 34.59 | Ba  | 47.34 | Aa   | 47.12 | Ba   |
|                                 | PPL        | 14.17                                                                            | Cab              | 18.20 | Ca  | 16.11 | Aab  | 8.63  | Cb   |
| 120                             | FM         | 65.22                                                                            | A a              | 60.53 | A a | 73.70 | A a  | 72.14 | A a  |
|                                 | MIX        | 41.29                                                                            | B ab             | 36.24 | B b | 58.85 | A a  | 40.67 | B ab |
|                                 | PPL        | 17.15                                                                            | C a              | 22.46 | C a | 18.48 | B a  | 14.98 | C a  |

<sup>1</sup> Net N<sub>min</sub> = Inorganic N<sub>d=x</sub> - Inorganic N Control<sub>t=x</sub> - Inorganic N of Material<sub>t=0</sub>

<sup>2</sup> Different uppercase letters represent significant differences within fertilizers at each sampling point, and different lowercase letters represents significant differences among different temperatures for each fertilizer and incubation time according to Tukey's honest significant difference test (P<0.05).

Supplemental Table S2. Complete Net N mineralized results (Net N<sub>min</sub><sup>1</sup>) from the feather meal (FM), mixed source (MIX), and pelleted poultry litter (PPL) fertilizers incubated at 4, 10, 20 and 30 °C for 120 d in a Tifton loamy sand soil.

| Time of<br>incubation<br>(Days) | Fertilizer | Temperature                                                                      |                  |       |      |       |      |       |      |
|---------------------------------|------------|----------------------------------------------------------------------------------|------------------|-------|------|-------|------|-------|------|
|                                 |            | 4°C                                                                              |                  | 10°C  |      | 20°C  |      | 30°C  |      |
|                                 |            | Net N <sub>min</sub> (mg inorganic N·kg <sup>-1</sup> dry material) <sup>1</sup> |                  |       |      |       |      |       |      |
| 2                               | FM         | 3.15                                                                             | A a <sup>2</sup> | 3.51  | A a  | 3.38  | A a  | 4.15  | B a  |
|                                 | MIX        | 0.24                                                                             | A b              | 3.31  | A ab | 0.00  | A b  | 4.02  | B a  |
|                                 | PPL        | 2.77                                                                             | A ab             | 0.00  | A b  | 4.94  | A ab | 11.26 | A a  |
| 4                               | FM         | 1.86                                                                             | A bc             | 0.00  | B c  | 14.46 | A ab | 18.60 | A a  |
|                                 | MIX        | 1.15                                                                             | A a              | 1.10  | B a  | 0.91  | B a  | 4.39  | A a  |
|                                 | PPL        | 2.24                                                                             | A b              | 9.65  | A ab | 13.26 | A a  | 8.57  | A ab |
| 7                               | FM         | 12.56                                                                            | Ba               | 12.33 | Aa   | 23.02 | Aa   | 13.64 | Aa   |
|                                 | MIX        | 2.66                                                                             | Cab              | 0.00  | Ab   | 9.92  | Aab  | 19.19 | Aa   |
|                                 | PPL        | 21.64                                                                            | Aa               | 8.65  | Aab  | 7.76  | Aab  | 4.37  | Ab   |
| 14                              | FM         | 28.06                                                                            | A a              | 28.68 | A a  | 44.01 | A a  | 33.82 | A a  |
|                                 | MIX        | 6.04                                                                             | B a              | 9.20  | B a  | 21.71 | AB a | 17.88 | AB a |
|                                 | PPL        | 15.21                                                                            | AB a             | 7.95  | B ab | 6.97  | B ab | 0.00  | B b  |
| 35                              | FM         | 50.74                                                                            | A ab             | 56.51 | A a  | 48.93 | A ab | 43.39 | A b  |
|                                 | MIX        | 20.31                                                                            | B a              | 28.73 | B a  | 30.62 | A a  | 35.51 | A a  |
|                                 | PPL        | 11.04                                                                            | C a              | 15.33 | C a  | 3.08  | B b  | 0.00  | B b  |
| 56                              | FM         | 58.61                                                                            | Aa               | 53.57 | Aab  | 43.43 | Ab   | 46.99 | Aab  |
|                                 | MIX        | 27.72                                                                            | Ba               | 27.48 | Ba   | 36.37 | Aa   | 29.44 | Aa   |
|                                 | PPL        | 8.91                                                                             | Cab              | 10.43 | Ca   | 2.45  | Bbc  | 0.00  | Bc   |
| 88                              | FM         | 62.18                                                                            | Aa               | 57.61 | Aab  | 46.20 | Abc  | 33.71 | Ac   |
|                                 | MIX        | 30.14                                                                            | Bab              | 24.15 | Bb   | 44.59 | Aa   | 29.95 | Aab  |
|                                 | PPL        | 8.81                                                                             | Ca               | 7.94  | Ca   | 15.76 | Aa   | 0.00  | Ba   |
| 120                             | FM         | 61.91                                                                            | A a              | 64.55 | A a  | 50.09 | A b  | 42.13 | A b  |
|                                 | MIX        | 28.43                                                                            | B b              | 31.55 | B b  | 49.49 | A a  | 26.24 | A b  |
|                                 | PPL        | 13.22                                                                            | C a              | 9.74  | C a  | 10.76 | B a  | 0.00  | B a  |

<sup>1</sup> Net N<sub>min</sub> = Inorganic N<sub>d=x</sub> - Inorganic N Control<sub>t=x</sub> - Inorganic N of Material<sub>t=0</sub>

<sup>2</sup>Different uppercase letters represent significant differences between fertilizers at each sampling point, and different lowercase letters represents significant differences among different temperatures for each fertilizer and incubation time according to Tukey's honest significant difference test (P<0.05).
